# Supplementary material for: Mediterranean Diet Adherence and Risk of All-Cause Mortality in Women
Source: PubMed Central journal article supplement (PMC11143458; doi:10.1001/jamanetworkopen.2024.14322), 2024-05-31
Supplement: jamanetwopen-e2414322-s001.pdf [file jamanetwopen-e2414322-s001.pdf]

## Supplemental Online Content

Ahmad S, Moorthy MV, Lee I, et al. Mediterranean diet adherence and risk of all-cause mortality in women. *JAMA Netw Open*. 2024;7(5):e2414322.  
doi:10.1001/jamanetworkopen.2024.14322

**eTable 1.** Association of Mediterranean Diet Adherence Score With All-Cause and CVD Mortality Events After Adjustment for Sets of Potential Mediators (Total Years Follow-Up)

**eTable 2.** Association of Per-Unit Increment in Mediterranean Diet Adherence With All-Cause and CVD Mortality Events After Adjustment for Sets of Potential Mediators (Total Years Follow-Up)

**eTable 3.** Mediation Effect Explained Through Different Risk Factors Regarding Mediterranean Diet Adherence With All-Cause Mortality Events

**eFigure 1.** Cumulative Survival for the Mediterranean Diet Adherence in CVD and Cancer Mortality Confirmed Person-Years

**eFigure 2.** Mediation Effect Explained for Different Risk Factors Using Counterfactual Framework Approach and Standard Mediation Approach Regarding Mediterranean Diet Adherence With All-Cause Mortality Events

This supplemental material has been provided by the authors to give readers additional information about their work.

**eTable 1.** Association of Mediterranean Diet Adherence Score With All-Cause and CVD Mortality Events After Adjustment for Sets of Potential Mediators (Total Years Follow-Up)

| <b>All-cause Mortality</b>                              |               |                  |                  |             |
|---------------------------------------------------------|---------------|------------------|------------------|-------------|
|                                                         | Score 0-3     | Score 4-5        | Score $\geq$ 6   | P for Trend |
| Age, treatment, and total energy intake- adjusted model | 1 [Reference] | 0.84 (0.78-0.90) | 0.77 (0.70-0.84) | <0.001      |
| Basic model*                                            | 1 [Reference] | 0.92 (0.85-0.99) | 0.89 (0.82-0.98) | 0.001       |
| <b>Cancer Mortality</b>                                 |               |                  |                  |             |
|                                                         | Score 0-3     | Score 4-5        | Score $\geq$ 6   | P for Trend |
| Age, treatment, and total energy intake- adjusted model | 1 [Reference] | 0.90 (0.80-1.02) | 0.80 (0.69-0.92) | 0.002       |
| Basic model*                                            | 1 [Reference] | 0.98 (0.87-1.10) | 0.92 (0.79-1.06) | 0.25        |
| <b>CVD Mortality</b>                                    |               |                  |                  |             |
|                                                         | Score 0-3     | Score 4-5        | Score $\geq$ 6   | P for Trend |
| Age, treatment, and total energy intake- adjusted model | 1 [Reference] | 0.86 (0.74-1.01) | 0.83 (0.69-0.99) | 0.033       |
| Basic model*                                            | 1 [Reference] | 0.95 (0.81-1.11) | 0.96 (0.80-1.16) | 0.65        |

\*Basic Model included age, randomized treat assignment; total energy intake (TEI, quintiles), smoking, menopausal status, postmenopausal hormone use, alcohol use, and physical activity. Participants were followed-up upto 25 years from baseline.

**Table 2.** Association of Per-Unit Increment in Mediterranean Diet Adherence With All-Cause and CVD Mortality Events After Adjustment for Sets of Potential Mediators (Total Years Follow-Up)

| <b>All-cause mortality</b>                              |                  |             |
|---------------------------------------------------------|------------------|-------------|
|                                                         | HR (95%CI)       | P for Trend |
| Age, treatment, and total energy intake- adjusted model | 0.94 (0.92-0.95) | <0.001      |
| Basic model*                                            | 0.97 (0.95-0.99) | 0.002       |
| <b>Cancer-mortality</b>                                 |                  |             |
|                                                         | HR (95%CI)       | P for Trend |
| Age, treatment, and total energy intake- adjusted model | 0.95 (0.92-0.98) | 0.001       |
| Basic model*                                            | 0.98 (0.95-1.01) | 0.22        |
| <b>CVD-mortality</b>                                    |                  |             |
|                                                         | HR (95%CI)       | P for Trend |
| Age, treatment, and total energy intake- adjusted model | 0.95 (0.92-0.99) | 0.015       |
| Basic model*                                            | 0.99 (0.94-1.02) | 0.33        |

\*Basic Model included age, randomized treat assignment; total energy intake (TEI, quintiles), smoking, menopausal status, postmenopausal hormone use, alcohol use, and physical activity. Participants were followed-up upto 25 years from baseline.

**Table 3.** Mediation Effect Explained Through Different Risk Factors Regarding Mediterranean Diet Adherence With All-Cause Mortality Events

|                                   | % Mediation effect explained<br>through Counterfactual<br>Framework | % Mediation effect<br>explained through<br>standard approach |
|-----------------------------------|---------------------------------------------------------------------|--------------------------------------------------------------|
| Basic Model                       |                                                                     |                                                              |
| BMI (kg/m <sup>2</sup> )          | 6.3                                                                 | 10.0                                                         |
| <b>Blood Pressure</b>             |                                                                     |                                                              |
| Systolic blood pressure, mmHg     | 8.2                                                                 | 6.7                                                          |
| Diastolic blood pressure, mmHg    | 5.0                                                                 | 3.3                                                          |
| <b>Lipids</b>                     |                                                                     |                                                              |
| LDL cholesterol, mg/dL            | 0.12                                                                | 0.0                                                          |
| HDL cholesterol, mg/dL            | 3.2                                                                 | 3.3                                                          |
| Triglycerides, mg/dL              | 0.9                                                                 | 3.3                                                          |
| Total cholesterol, mg/dL          | 0.2                                                                 | 0.0                                                          |
| <b>Apolipoprotein</b>             |                                                                     |                                                              |
| Lipoprotein(a), mg/dL             | -0.7                                                                | 0.0                                                          |
| Apolipoprotein A1, mg/dL          | 1.8                                                                 | 0.0                                                          |
| Apolipoprotein B-100, mg/dL       | -0.04                                                               | 0.0                                                          |
| <b>LDL particles and size</b>     |                                                                     |                                                              |
| cLDLP, nmol/L                     | 0.0                                                                 | 0.0                                                          |
| LDLZ, nm                          | 1.8                                                                 | 3.3                                                          |
| <b>HDL particles and size</b>     |                                                                     |                                                              |
| cHDLP, $\mu$ mol/L                | 0.9                                                                 | 0.0                                                          |
| HDLZ, nm                          | 1.1                                                                 | 3.3                                                          |
| <b>TRL particles and size</b>     |                                                                     |                                                              |
| TRLP, nmol/L                      | -0.7                                                                | 0.0                                                          |
| TRLZ, nm                          | 5.5                                                                 | 10.0                                                         |
| <b>Glycemic</b>                   |                                                                     |                                                              |
| Hemoglobin A1c                    | 3.2                                                                 | 3.3                                                          |
| <b>Insulin resistance</b>         |                                                                     |                                                              |
| LPIR, Score 1-100                 | 4.3                                                                 | 6.7                                                          |
| DRI, Score 1-100                  | 2.6                                                                 | 6.7                                                          |
| <b>Inflammation pathway</b>       |                                                                     |                                                              |
| High-sensitivity CRP, mg/L        | 6.0                                                                 | 10.0                                                         |
| Fibrinogen, mg/dL                 | 0.7                                                                 | 0.0                                                          |
| Soluble ICAM-1, ng/mL             | 9.6                                                                 | 13.3                                                         |
| <b>Branched-chain amino acids</b> |                                                                     |                                                              |
| Total BCAA, $\mu$ mol/L           | 0.3                                                                 | 0.0                                                          |
| Valine, $\mu$ mol/L               | 3.2                                                                 | 0.0                                                          |
| Leucine, $\mu$ mol/L              | 0.3                                                                 | 0.0                                                          |
| Isoleucine, $\mu$ mol/L           | 2.2                                                                 | 3.3                                                          |
| <b>Small molecule metabolites</b> |                                                                     |                                                              |
| Citrate, $\mu$ mol/L              | -0.3                                                                | 0.0                                                          |
| Creatinine, mg/dL                 | -0.1                                                                | 0.0                                                          |
| Homocysteine, $\mu$ mol/L         | 6.0                                                                 | 10.0                                                         |
| Alanine, mg/dL                    | 5.5                                                                 | 6.7                                                          |

\*Basic Model included age, randomized treat assignment; total energy intake (TEI, quintiles), smoking, menopausal status, postmenopausal hormone use, alcohol use, physical activity.

Abbreviations: BMI, body mass index (calculated as weight in kilograms divided by height in 1 meters squared); HDL, high-density lipoprotein; HR, hazard ratio; LDL, low-density 2 lipoprotein; TRL, triglyceride-rich lipoprotein; LPIR, lipoprotein insulin resistance; DRI, 5-years diabetes risk factor index; CRP, C-reactive protein; ICAM-1, Soluble intracellular adhesion molecule 1; BCAA, branched-chain amino acids.

**eFigure 1.** Cumulative Survival for the Mediterranean Diet Adherence in CVD and Cancer Mortality Confirmed Person-Years

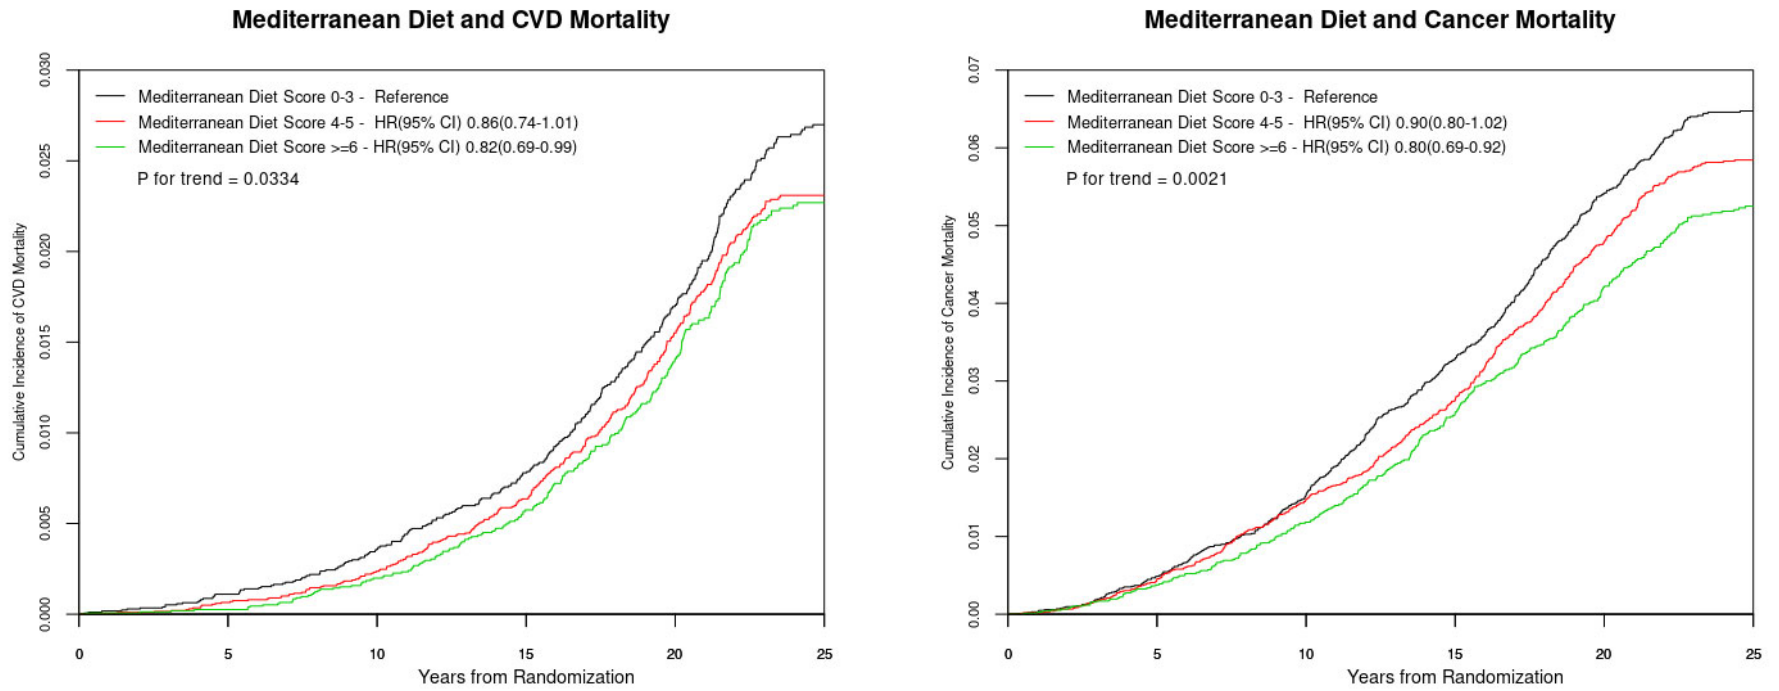

The analyses were adjusted for age, treatment, and total energy intake.

**Figure 2.** Mediation Effect Explained for Different Risk Factors Using Counterfactual Framework Approach and Standard Mediation Approach Regarding Mediterranean Diet Adherence With All-Cause Mortality Events

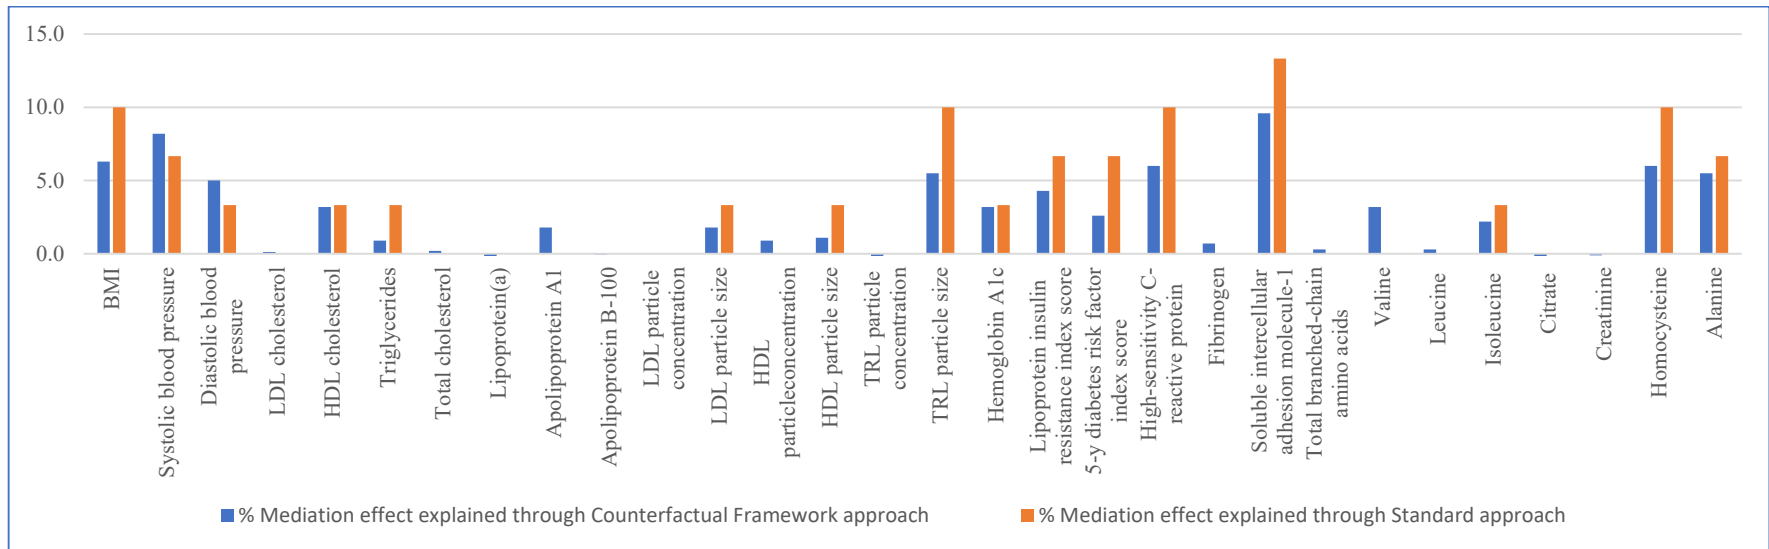

Abbreviations: BMI, body mass index (calculated as weight in kilograms divided by height in 1 meters squared); HDL, high-density lipoprotein; HR, hazard ratio; LDL, low-density 2 lipoprotein; TRL, triglyceride-rich lipoprotein.
