# Supplementary material for: Mediterranean Diet Adherence and Risk of All-Cause Mortality in Women
Source: PubMed Central journal article supplement (PMC11143458; doi:10.1001/jamanetworkopen.2024.14322), 2024-05-31
Supplement: jamanetwopen-e2414322-s002.pdf [file jamanetwopen-e2414322-s002.pdf]

## Data Sharing Statement

Ahmad. Mediterranean Diet Adherence and Risk of All-Cause Mortality in Women. *JAMA Netw Open*. Published May 31, 2024. doi:10.1001/jamanetworkopen.2024.14322

### Data

**Data available:** No

### Additional Information

**Explanation for why data not available:** Deidentified limited dataset requests upon review and approval by the Women's Health Study Publications Committee.
